# Supplementary material for: Electrochemical, top-down nanostructured pseudocapacitive electrodes for enhanced specific capacitance and cycling efficiency
Source: Royal Society of Chemistry journal article supplement (doi:10.1039/c7nr08164b), 2018-01-01
Supplement: c7nr08164b1.pdf [file c7nr08164b1.pdf]

## Electronic supplementary information

### Electrochemical, top-down nanostructured pseudocapacitive electrode for enhanced specific capacitance and cycling efficiency

Vishwanath Kalyani, <sup>#a</sup> Sudeshna Mondal, <sup>#a</sup> Jayeeta Saha <sup>#a</sup> and Chandramouli Subramaniam <sup>\*a</sup>

<sup>a</sup>Department of Chemistry, Indian Institute of Technology Bombay, Powai 400076, India.

\*E.mail for correspondence: csubbu@chem.iitb.ac.in

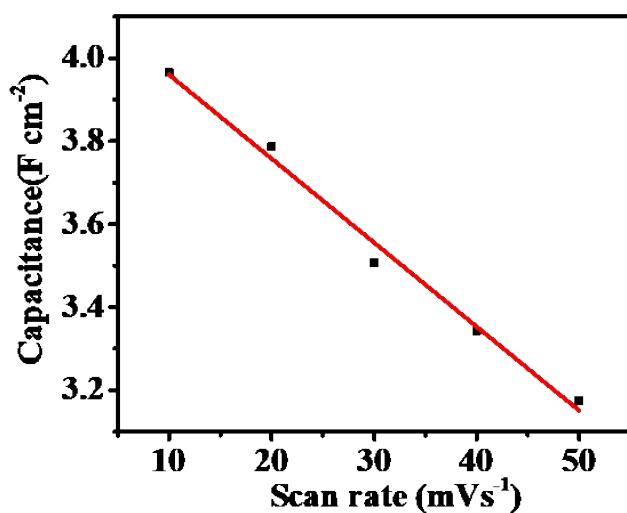

**Fig S1.** a)  
capacitance with

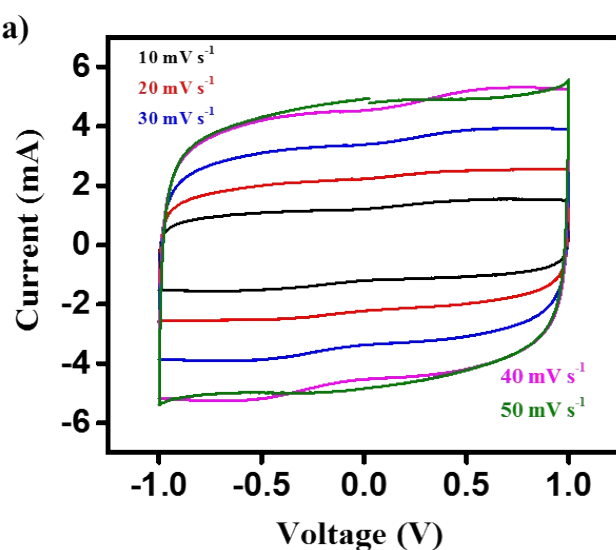

Variation of areal  
scan rate.

**Fig S2.** Cycling voltamograms of the CNT bucky paper at different scan rate indicating no pseudocapacitive component.

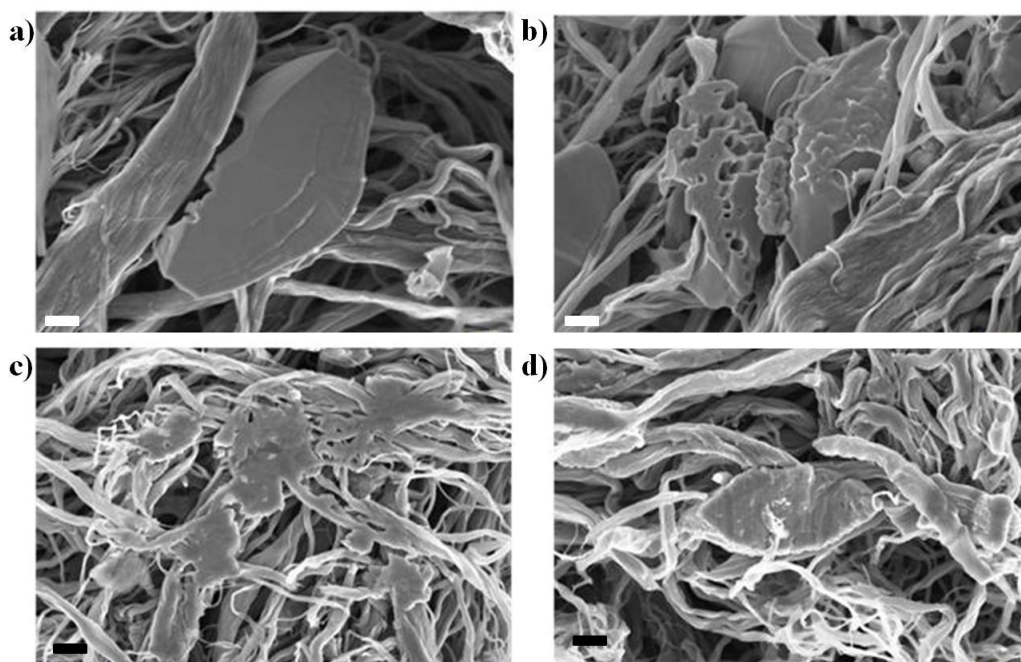

**Fig S3.** SEM images of CNT/MnMoO<sub>4</sub> (a, b) 100 cycle and (c, d) 500 cycles.

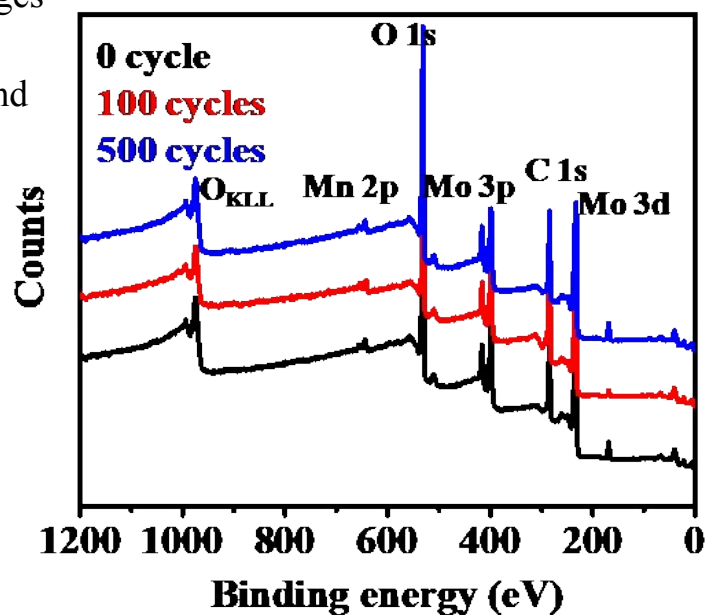

of electrode after (c, d) 500

**Fig S4.** Survey spectrum of CNT/MnMoO<sub>4</sub> electrode at different stages of electrochemical cycling.

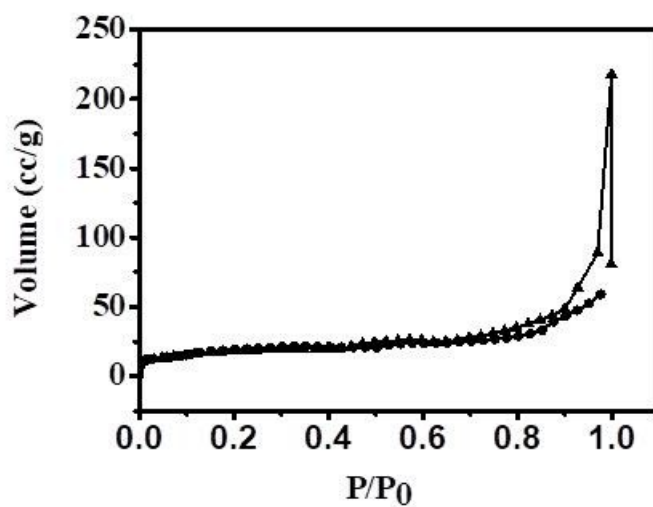

**Fig S5.** Nitrogen adsorption isotherm for CNT bucky paper.

**Table T1:** Comparison of surface area parameters for CNT bucky paper and CNT/MnMoO<sub>4</sub> electrode at different cycles.

| Materials                           | BET Specific surface area (m <sup>2</sup> /g) | Pore volume (cc/g) | % change in SSA | External surface area from <i>V-t</i> plots (cc/g.A) |
|-------------------------------------|-----------------------------------------------|--------------------|-----------------|------------------------------------------------------|
| CNT- bulky paper                    | 714                                           | 0.33               | + 0 %           | 3.5                                                  |
| CNT/MnMoO <sub>4</sub> (0 cycles)   | 1086                                          | 10.37              | + 52%           | 2.2                                                  |
| CNT/MnMoO <sub>4</sub> (100 cycles) | 1337                                          | 13.62              | + 87%           | 1.8                                                  |
| CNT/MnMoO <sub>4</sub> (500 cycles) | 1726                                          | 13.74              | + 142%          | 2.9                                                  |

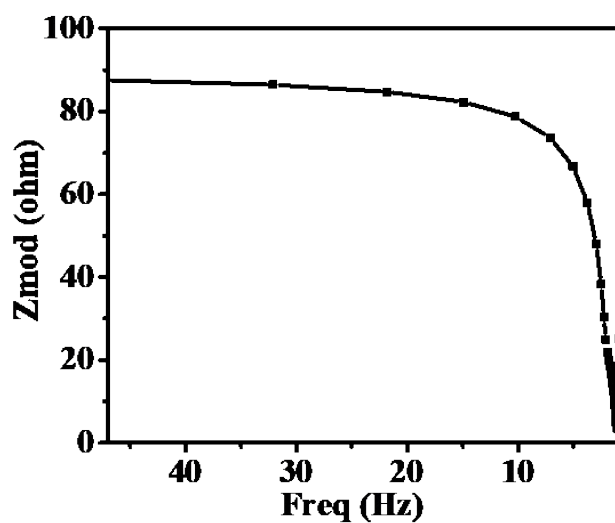

**Fig S6.** Bode plot indicating the dependence of phase angle on frequency of CNT/MnMoO<sub>4</sub> electrode.

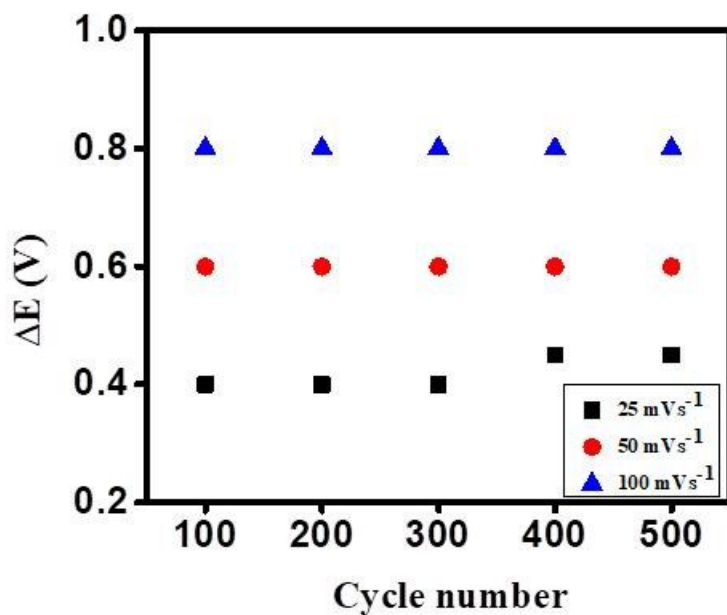

**Fig S7.** Evidence of mass diffusion during electrochemical cycling of CNT/MnMoO<sub>4</sub> electrode.

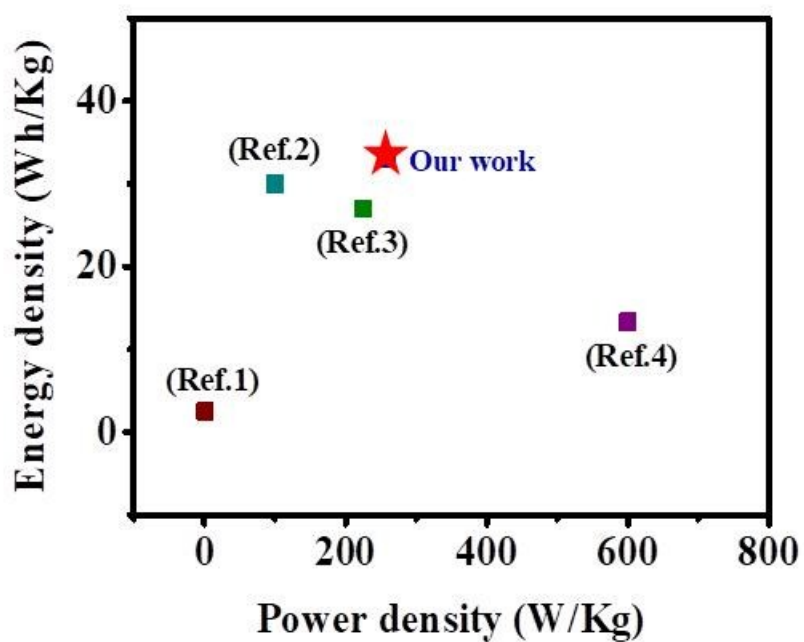

**Fig S8.** Ragone plot for the comparison of energy and power density with other reports based on MnO<sub>2</sub>-CNT hybrid electrode.

## References:

1. Y. Zhao, M. P. Li, S. Liu, and M. F. Islam, *ACS Applied Materials & Interfaces*, 2017, 9, **28**, 23810.
2. E. M. Jin, J. G. Lim, and S. M. Jeong, *Journal of Industrial and Engineering Chemistry*, 2017, **54**, 421.
3. D. Gueon and J. H. Moon, *ACS Sustainable Chemistry & Engineering*, 2017, 5, **3**, 2445.
4. L. Li, Z. A. Hu, N. An, Y. Y. Yang, Z. M. Li and H. Y. Wu, *J. Phys. Chem. C*, 2014, **118**, 40, 22865.
